# Supplementary material for: Next Generation Sequencing Analysis Reveals Segmental Patterns of microRNA Expression in Mouse Epididymal Epithelial Cells
Source: PubMed Central journal article supplement (PMC4535982; doi:10.1371/journal.pone.0135605), 2015-08-13
Supplement: pone.0135605.s004.pdf [file pone.0135605.s004.pdf]

|         |               |   |   |   |   |   |   |   |   |
|---------|---------------|---|---|---|---|---|---|---|---|
| miR-139 | miR-139-5p    | + | + | - | + | + | - | - | + |
| miR-140 | miR-140-3p    | + | + | + | + | + | + | - | + |
|         | miR-140-5p    | + | + | + | + | + | + | + | + |
| miR-141 | miR-141-3p    | + | + | + | + | + | + | + | + |
|         | miR-141-5p    | + | + | + | + | + | + | - | + |
| miR-143 | miR-143-3p    | + | + | + | + | + | + | + | + |
| miR-144 | miR-144-3p    | + | + | - | + | + | - | - | + |
| miR-146 | miR-146a-5p   | + | + | + | + | + | + | + | + |
|         | miR-146b-5p   | + | + | + | + | + | + | + | + |
| miR-148 | miR-148a-3p   | + | + | + | + | + | + | + | + |
|         | miR-148a-5p   | + | + | + | + | + | + | + | + |
|         | miR-148b-3p   | + | + | + | + | + | + | + | + |
|         | miR-148b-5p   | + | + | + | + | + | + | - | - |
| miR-149 | miR-149-5p    | + | + | + | + | + | + | - | + |
| miR-150 | miR-150-5p    | + | + | + | + | + | + | + | + |
| miR-151 | miR-151-3p    | + | + | + | + | + | + | + | + |
|         | miR-151-5p    | + | + | + | + | + | + | + | + |
| miR-152 | miR-152-3p    | + | + | + | + | + | + | + | + |
|         | miR-152-5p    | + | + | + | + | + | + | - | + |
| miR-153 | miR-153-3p    | + | + | + | + | + | + | - | - |
| miR-181 | miR-181a-1-3p | + | + | + | + | + | + | - | + |
|         | miR-181a-5p   | + | + | + | + | + | + | + | + |
|         | miR-181b-5p   | + | + | + | + | + | + | + | + |
|         | miR-181c-3p   | + | + | + | + | + | + | + | + |
|         | miR-181c-5p   | + | + | + | + | + | + | + | + |
|         | miR-181d-5p   | + | + | + | + | + | + | + | + |
| miR-182 | miR-182-5p    | + | + | + | + | + | + | + | + |
| miR-183 | miR-183-5p    | + | + | + | + | + | + | + | + |
| miR-184 | miR-184-3p    | + | + | + | + | + | + | - | + |
| miR-186 | miR-186-5p    | + | + | + | + | + | + | + | + |
| miR-187 | miR-187-3p    | + | + | + | + | + | + | + | + |
| miR-191 | miR-191-5p    | + | + | + | + | + | + | + | + |
| miR-192 | miR-192-5p    | + | + | + | + | + | + | + | + |
| miR-194 | miR-194-5p    | + | + | + | + | + | + | - | + |
| miR-196 | miR-196a-5p   | + | + | + | + | + | + | + | + |
|         | miR-196b-5p   | + | + | + | + | + | + | + | + |
| miR-199 | miR-199a-3p   | + | + | + | + | + | + | + | + |
|         | miR-199a-5p   | + | + | + | + | + | + | + | + |
|         | miR-199b-3p   | + | + | + | + | + | + | + | + |
|         | miR-199b-5p   | + | + | + | + | + | + | - | + |
| miR-200 | miR-200a-3p   | + | + | + | + | + | + | + | + |
|         | miR-200a-5p   | + | + | + | + | + | + | + | + |
|         | miR-200b-3p   | + | + | + | + | + | + | + | + |
|         | miR-200b-5p   | + | + | + | + | + | + | - | + |
|         | miR-200c-3p   | + | + | + | + | + | + | + | + |
| miR-203 | miR-203-3p    | + | + | + | + | + | + | + | + |
| miR-204 | miR-204-5p    | + | + | + | + | + | + | + | + |
| miR-205 | miR-205-5p    | + | + | + | + | + | + | + | + |
| miR-210 | miR-210-3p    | + | + | + | + | + | + | + | + |
| miR-214 | miR-214-3p    | + | + | + | + | + | + | + | + |
| miR-218 | miR-218-5p    | + | + | + | + | + | + | + | + |
| miR-221 | miR-221-3p    | + | + | + | + | + | + | + | + |
|         | miR-221-5p    | + | + | + | + | + | + | - | - |
| miR-222 | miR-222-3p    | + | + | + | + | + | + | + | + |
| miR-300 | miR-300-3p    | + | + | + | + | + | - | - | + |
| miR-301 | miR-301a-3p   | + | + | + | + | + | + | + | + |
| miR-320 | miR-320-3p    | + | + | + | + | + | + | + | + |
| miR-322 | miR-322-5p    | + | + | + | + | + | + | + | + |
| miR-    | miR-324-5p    | + | + | + | + | + | + | + | + |
| miR-326 | miR-326-3p    | + | + | + | + | + | + | - | + |
| miR-328 | miR-328-3p    | + | + | + | + | + | + | + | + |
| miR-338 | miR-338-3p    | + | + | + | + | + | + | - | + |
| miR-339 | miR-339-5p    | + | + | + | + | + | + | - | + |
| miR-340 | miR-340-5p    | + | + | + | + | + | + | + | + |
| miR-342 | miR-342-3p    | + | + | + | + | + | + | + | + |
| miR-350 | miR-350-3p    | + | + | + | - | + | + | - | - |
| miR-351 | miR-351-5p    | + | + | + | + | + | + | + | + |
| miR-361 | miR-361-5p    | + | + | + | + | + | + | + | + |
| miR-362 | miR-362-3p    | + | + | + | + | + | + | - | - |
| miR-365 | miR-365-3p    | + | + | + | + | + | - | - | + |
| miR-375 | miR-375-3p    | + | + | + | + | + | + | + | + |
| miR-379 | miR-379-5p    | + | + | + | + | + | - | - | + |
| miR-381 | miR-381-3p    | + | + | + | + | + | - | - | + |
| miR-409 | miR-409-5p    | + | + | + | + | + | - | - | + |
| miR-410 | miR-410-3p    | + | + | + | + | + | + | + | + |
| miR-411 | miR-411-5p    | + | + | + | + | + | + | + | + |
| miR-421 | miR-421-3p    | + | + | + | + | + | + | + | + |
| miR-423 | miR-423-3p    | + | + | + | + | + | + | + | + |
| miR-423 | miR-423-5p    | + | + | + | + | + | + | + | + |
| miR-425 | miR-425-5p    | + | + | + | + | + | + | + | + |
| miR-429 | miR-429-3p    | + | + | + | + | + | + | + | + |

|          |               |   |   |   |   |   |   |   |   |
|----------|---------------|---|---|---|---|---|---|---|---|
| miR-434  | miR-434-3p    | + | + | + | + | + | + | + | + |
| miR-449  | miR-449a-5p   | + | + | + | + | + | + | - | + |
| miR-450  | miR-450a-5p   | + | + | + | + | + | + | - | + |
| miR-455  | miR-455-5p    | + | + | + | + | + | + | - | - |
| miR-465  | miR-465a-5p   | + | + | + | + | + | - | - | + |
|          | miR-465c-5p   | + | + | + | + | + | - | + | + |
| miR-467  | miR-467a-5p   | + | + | + | + | + | + | + | + |
|          | miR-467d-5p   | + | + | + | + | - | + | - | - |
| miR-470  | miR-470-5p    | + | + | + | + | + | + | + | + |
| miR-484  | miR-484       | + | + | + | + | + | + | + | + |
| miR-501  | miR-501-3p    | + | + | + | + | + | + | + | + |
| miR-532  | miR-532-5p    | + | + | + | + | + | + | + | + |
| miR-541  | miR-541-5p    | + | + | + | + | + | - | - | + |
| miR-574  | miR-574-3p    | + | + | + | + | + | + | - | + |
| miR-582  | miR-582-3p    | + | + | + | + | + | + | - | - |
|          | miR-582-5p    | + | + | + | - | + | + | - | - |
| miR-652  | miR-652-3p    | + | + | + | + | + | + | + | + |
| miR-669  | miR-669a-5p   | + | + | + | - | - | + | - | - |
|          | miR-669c-5p   | + | + | + | + | + | + | - | - |
|          | miR-669p-5p   | + | + | + | - | - | + | - | - |
| miR-671  | miR-671-3p    | + | + | + | + | + | + | - | - |
| miR-672  | miR-672-5p    | + | + | + | + | + | + | + | + |
| miR-676  | miR-676-3p    | + | + | + | + | + | + | - | + |
| miR-741  | miR-741-3p    | + | + | + | + | + | - | + | + |
| miR-743  | miR-743b-3p   | + | + | + | + | + | - | + | + |
| miR-744  | miR-744-5p    | + | + | + | + | + | + | + | + |
| miR-871  | miR-871-3p    | + | + | + | + | + | + | + | + |
|          | miR-871-5p    | + | + | + | + | + | - | - | + |
| miR-872  | miR-872-3p    | + | + | + | + | + | + | + | + |
|          | miR-872-5p    | + | + | + | + | + | + | + | + |
| miR-881  | miR-881-3p    | + | + | + | + | + | - | + | + |
| miR-1198 | miR-1198-5p   | + | + | + | + | + | + | - | + |
| miR-1249 | miR-1249-3p   | + | + | + | + | + | + | - | - |
| miR-1251 | miR-1251-5p   | + | + | + | + | + | + | - | - |
| miR-1839 | miR-1839-5p   | + | + | + | + | + | + | + | + |
| miR-1843 | miR-1843b-5p  | + | + | + | + | + | + | - | - |
| miR-1    | miR-1a-3p     | + | - | + | + | + | + | - | - |
| miR-7    | let-7c-1-3p   | + | - | + | + | + | + | - | - |
|          | let-7e-3p     | + | - | + | + | + | + | - | - |
|          | let-7f-1-3p   | + | - | + | + | + | + | - | - |
|          | let-7i-3p     | + | - | + | + | + | + | - | - |
|          | let-7j        | + | - | + | + | + | + | - | - |
|          | miR-7a-1-3p   | + | - | + | + | + | + | - | - |
| miR-10   | miR-10b-3p    | + | - | + | + | + | - | - |   |
| miR-15   | miR-15b-3p    | + | - | + | + | + | - | - |   |
| miR-17   | miR-17-3p     | + | - | + | + | - | - | - |   |
| miR-18   | miR-18a-5p    | + | - | + | + | + | - | - |   |
| miR-21   | miR-21a-3p    | + | - | + | + | + | - | - | - |
|          | miR-21a-5p    | + | - | + | + | + | - | - | - |
| miR-26   | miR-26a-2-3p  | + | - | + | - | + | - | - | - |
|          | miR-26b-3p    | + | - | + | + | + | - | - | - |
| miR-27   | miR-27a-5p    | + | - | + | + | + | - | - | - |
|          | miR-27b-5p    | + | - | + | + | + | - | - | - |
| miR-28   | miR-28a-3p    | + | - | + | + | + | - | - | - |
|          | miR-28a-5p    | + | - | + | + | + | - | - | - |
| miR-30   | miR-30b-3p    | + | - | + | + | + | - | - | - |
|          | miR-30c-1-3p  | + | - | + | + | + | - | - | - |
| miR-31   | miR-31-3p     | + | - | + | - | - | - | - |   |
| miR-32   | miR-32-3p     | + | - | + | - | - | - | - | - |
|          | miR-32-5p     | + | - | + | - | - | - | - | - |
| miR-33   | miR-33-3p     | + | - | + | - | - | - | - |   |
| miR-34   | miR-34c-3p    | + | - | + | + | + | - | - |   |
| miR-92   | miR-92a-1-5p  | + | - | + | + | + | - | - |   |
| miR-96   | miR-96-3p     | + | - | + | - | - | - | - |   |
| miR-98   | miR-98-3p     | + | - | + | - | + | - | - |   |
| miR-99   | miR-99a-3p    | + | - | + | - | + | - | - |   |
| miR-101  | miR-101a-5p   | + | - | + | - | + | - | - |   |
| miR-106  | miR-106b-3p   | + | - | - | - | + | - | - |   |
| miR-124  | miR-124-3p    | + | - | - | - | + | - | - |   |
| miR-125  | miR-125a-3p   | + | - | + | + | + | - | - |   |
| miR-126  | miR-126a-3p   | + | - | + | + | + | - | - | - |
|          | miR-126a-5p   | + | - | + | + | + | - | - | - |
| miR-127  | miR-127-5p    | + | - | - | - | + | - | - |   |
| miR-130  | miR-130b-3p   | + | - | + | + | + | - | - | - |
|          | miR-130b-5p   | + | - | + | + | + | - | - | - |
| miR-133  | miR-133b-3p   | + | - | - | - | + | - | - |   |
| miR-134  | miR-134-5p    | + | - | - | - | + | - | - |   |
| miR-135  | miR-135a-2-3p | + | - | + | - | - | - | - | - |
|          | miR-135b-5p   | + | - | + | + | - | - | - | - |
| miR-136  | miR-136-3p    | + | - | + | + | + | - | - | - |
|          | miR-136-5p    | + | - | + | + | + | - | - | - |

|          |               |   |   |   |   |   |   |   |   |
|----------|---------------|---|---|---|---|---|---|---|---|
| miR-137  | miR-137-3p    | + | - | - | - | + | - | - | - |
| miR-142  | miR-142a-3p   | + | - | + | + | + | - | - | - |
|          | miR-142a-5p   | + | - | + | + | + | - | - | - |
| miR-143  | miR-143-5p    | + | - | - | - | + | - | - | - |
| miR-144  | miR-144-5p    | + | - | - | + | + | - | - | - |
| miR-145  | miR-145a-3p   | + | - | + | + | + | - | - | - |
|          | miR-145a-5p   | + | - | + | + | + | - | - | - |
| miR-154  | miR-154-5p    | + | - | - | + | + | - | - | - |
| miR-155  | miR-155-5p    | + | - | - | - | + | - | - | - |
| miR-185  | miR-185-5p    | + | - | + | + | + | - | - | - |
| miR-188  | miR-188-3p    | + | - | - | - | + | - | - | - |
| miR-190  | miR-190a-3p   | + | - | - | + | - | - | - | - |
|          | miR-190a-5p   | + | - | + | + | + | - | - | - |
| miR-191  | miR-191-3p    | + | - | + | - | - | - | - | - |
| miR-193  | miR-193a-3p   | + | - | + | + | + | - | - | - |
|          | miR-193b-3p   | + | - | + | + | + | - | - | - |
| miR-195  | miR-195a-3p   | + | - | + | + | + | - | - | - |
|          | miR-195a-5p   | + | - | + | + | + | - | - | - |
| miR-196  | miR-196a-2-3p | + | - | - | + | + | - | - | - |
|          | miR-196b-3p   | + | - | - | - | + | - | - | - |
| miR-200  | miR-200c-5p   | + | - | + | + | + | - | - | - |
| miR-203  | miR-203-5p    | + | - | + | - | + | - | - | - |
| miR-205  | miR-205-3p    | + | - | + | + | + | - | - | - |
| miR-206  | miR-206-3p    | + | - | - | - | + | - | - | - |
| miR-208  | miR-208b-3p   | + | - | - | - | + | - | - | - |
| miR-210  | miR-210-5p    | + | - | + | + | + | - | - | - |
| miR-211  | miR-211-5p    | + | - | - | + | - | - | - | - |
| miR-212  | miR-212-5p    | + | - | - | - | + | - | - | - |
| miR-214  | miR-214-5p    | + | - | + | + | + | - | - | - |
| miR-222  | miR-222-5p    | + | - | + | - | - | - | - | - |
| miR-223  | miR-223-3p    | + | - | + | + | + | - | - | - |
| miR-296  | miR-296-5p    | + | - | + | + | + | - | - | - |
| miR-298  | miR-298-5p    | + | - | + | + | + | - | - | - |
| miR-299  | miR-299a-3p   | + | - | - | - | + | - | - | - |
|          | miR-299a-5p   | + | - | - | - | + | - | - | - |
| miR-301  | miR-301b-3p   | + | - | + | - | + | - | - | - |
| miR-322  | miR-322-3p    | + | - | + | + | + | - | - | - |
| miR-324  | miR-324-3p    | + | - | - | + | - | - | - | - |
| miR-329  | miR-329-3p    | + | - | - | - | + | - | - | - |
|          | miR-329-5p    | + | - | + | - | + | - | - | - |
| miR-330  | miR-330-5p    | + | - | + | + | + | - | - | - |
| miR-331  | miR-331-3p    | + | - | + | + | + | - | - | - |
| miR-335  | miR-335-3p    | + | - | + | + | + | - | - | - |
|          | miR-335-5p    | + | - | + | + | + | - | - | - |
| miR-337  | miR-337-5p    | + | - | + | + | + | - | - | - |
| miR-339  | miR-339-3p    | + | - | + | + | + | - | - | - |
| miR-340  | miR-340-3p    | + | - | + | + | + | - | - | - |
| miR-341  | miR-341-3p    | + | - | + | + | + | - | - | - |
| miR-345  | miR-345-5p    | + | - | + | + | - | - | - | - |
| miR-361  | miR-361-3p    | + | - | + | - | - | - | - | - |
| miR-362  | miR-362-5p    | + | - | + | - | - | - | - | - |
| miR-369  | miR-369-3p    | + | - | - | + | + | - | - | - |
| miR-374  | miR-374b-5p   | + | - | + | + | + | - | - | - |
| miR-376  | miR-376a-3p   | + | - | - | - | + | - | - | - |
|          | miR-376a-5p   | + | - | - | - | + | - | - | - |
|          | miR-376b-3p   | + | - | + | + | + | - | - | - |
|          | miR-376c-3p   | + | - | + | - | + | - | - | - |
| miR-378  | miR-378a-3p   | + | - | + | + | + | - | - | - |
|          | miR-378a-5p   | + | - | + | + | + | - | - | - |
|          | miR-378b      | + | - | - | - | + | - | - | - |
|          | miR-378c      | + | - | + | + | + | - | - | - |
| miR-378d | +             | - | + | + | + | - | - | - |   |
| miR-379  | miR-379-3p    | + | - | - | - | + | - | - | - |
| miR-382  | miR-382-5p    | + | - | + | + | + | - | - | - |
| miR-409  | miR-409-3p    | + | - | + | + | + | - | - | - |
| miR-411  | miR-411-3p    | + | - | - | - | + | - | - | - |
| miR-431  | miR-431-5p    | + | - | - | - | + | - | - | - |
| miR-434  | miR-434-5p    | + | - | + | + | + | - | - | - |
| miR-450  | miR-450b-5p   | + | - | + | - | - | - | - | - |
| miR-451  | miR-451a      | + | - | + | + | + | - | - | - |
| miR-463  | miR-463-5p    | + | - | - | - | + | - | - | - |
| miR-465  | miR-465a-3p   | + | - | + | + | + | - | - | - |
|          | miR-465b-3p   | + | - | + | + | + | - | - | - |
|          | miR-465b-5p   | + | - | - | + | + | - | - | - |
|          | miR-465c-3p   | + | - | + | + | + | - | - | - |
| miR-466  | miR-466b-3p   | + | - | + | - | - | - | - | - |
|          | miR-466c-3p   | + | - | + | - | - | - | - | - |
|          | miR-466g      | + | - | + | - | - | - | - | - |
|          | miR-467b-5p   | + | - | + | + | - | - | - | - |
| miR-467  | miR-467c-5p   | + | - | + | + | + | - | - | - |
|          | miR-467d-3p   | + | - | + | - | - | - | - | - |

|          |              |   |   |   |   |   |   |   |   |
|----------|--------------|---|---|---|---|---|---|---|---|
|          | miR-467e-5p  | + | - | + | + | + | - | - | - |
|          | miR-470-3p   | + | - | - | + | + | - | - | - |
| miR-470  | miR-471-3p   | + | - | - | + | + | - | - | - |
| miR-471  | miR-485-5p   | + | - | - | - | + | - | - | - |
| miR-485  | miR-486a-3p  | + | - | - | - | + | - | - | - |
| miR-486  | miR-486a-5p  | + | - | + | + | + | - | - | - |
|          | miR-486b-5p  | + | - | + | + | + | - | - | - |
|          | miR-487b-3p  | + | - | - | - | + | - | - | - |
| miR-487  | miR-497a-5p  | + | - | + | + | + | - | - |   |
| miR-497  | miR-499-5p   | + | - | - | - | + | - | - |   |
| miR-499  | miR-500-3p   | + | - | + | - | + | - | - |   |
| miR-500  | miR-511-3p   | + | - | + | + | + | - | - |   |
| miR-511  | miR-532-3p   | + | - | + | + | + | - | - |   |
| miR-532  | miR-574-5p   | + | - | + | + | + | - | - |   |
| miR-574  | miR-598-3p   | + | - | + | + | - | - | - |   |
| miR-598  | miR-615-3p   | + | - | + | + | + | - | - |   |
| miR-615  | miR-669a-3p  | + | - | + | - | + | - | - |   |
| miR-669  | miR-669f-5p  | + | - | + | - | - | - | - | - |
|          | miR-669l-5p  | + | - | + | - | - | - | - | - |
|          | miR-669o-3p  | + | - | + | - | + | - | - | - |
|          | miR-669o-5p  | + | - | + | + | + | - | - | - |
|          | miR-672-3p   | + | - | + | + | - | - | - | - |
| miR-672  | miR-674-3p   | + | - | + | - | + | - | - |   |
| miR-674  | miR-676-5p   | + | - | + | + | + | - | - |   |
| miR-676  | miR-677-5p   | + | - | - | + | + | - | - |   |
| miR-677  | miR-708-3p   | + | - | + | + | + | - | - |   |
| miR-708  | miR-708-5p   | + | - | - | + | + | - | - | - |
|          | miR-741-5p   | + | - | - | - | + | - | - | - |
| miR-741  | miR-743a-3p  | + | - | + | + | + | - | - |   |
| miR-743  | miR-743a-5p  | + | - | - | - | + | - | - | - |
|          | miR-744-3p   | + | - | + | + | + | - | - | - |
| miR-744  | miR-874-3p   | + | - | + | + | + | - | - |   |
| miR-874  | miR-874-5p   | + | - | + | + | + | - | - | - |
|          | miR-878-5p   | + | - | - | + | + | - | - | - |
| miR-878  | miR-880-3p   | + | - | - | + | + | - | - |   |
| miR-880  | miR-883a-3p  | + | - | - | + | + | - | - |   |
| miR-883  | miR-1247-3p  | + | - | + | + | + | - | - |   |
| miR-1247 | miR-1247-5p  | + | - | - | + | + | - | - | - |
|          | miR-1839-3p  | + | - | + | - | - | - | - | - |
| miR-1839 | miR-1843a-5p | + | - | + | + | + | - | - |   |
| miR-1843 | miR-1981-3p  | + | - | + | + | + | - | - |   |
| miR-1981 | miR-1981-5p  | + | - | + | + | + | - | - | - |
|          | miR-3068-3p  | + | - | + | + | + | - | - | - |
| miR-3068 | miR-3068-5p  | + | - | + | - | - | - | - | - |
|          | miR-3082-3p  | + | - | - | + | - | - | - | - |
| miR-3082 | miR-3475-3p  | + | - | - | + | - | - | - |   |
| miR-3475 | miR-3535     | + | - | + | - | - | - | - |   |
| miR-3535 | miR-8114     | + | - | + | + | + | - | - |   |
| miR-8114 | miR-466p-3p  | + | - | + | - | - | - | - |   |
| miR-21   | miR-21-3p    | - | + | - | - | - | + | - | + |
|          | miR-21-5p    | - | + | - | - | - | + | + | + |
| miR-28   | miR-28-3p    | - | + | - | - | - | + | + | + |
|          | miR-28-5p    | - | + | - | - | - | + | + | + |
| miR-126  | miR-126-3p   | - | + | - | - | - | + | + | + |
|          | miR-126-5p   | - | + | - | - | - | + | + | + |
| miR-129  | miR-129-2-3p | - | + | - | - | - | - | + |   |
| miR-142  | miR-142-5p   | - | + | - | - | - | + | + | + |
| miR-145  | miR-145-3p   | - | + | - | - | - | + | + | + |
|          | miR-145-5p   | - | + | - | - | - | + | + | + |
| miR-190  | miR-190-5p   | - | + | - | - | - | - | + | + |
| miR-193  | miR-193-3p   | - | + | - | - | - | + | + | + |
| miR-195  | miR-195-5p   | - | + | - | - | - | + | + | + |
| miR-374  | miR-374-5p   | - | + | - | - | - | + | + | + |
| miR-378  | miR-378-3p   | - | + | - | - | - | + | + | + |
|          | miR-378-5p   | - | + | - | - | - | + | - | - |
| miR-451  | miR-451      | - | + | - | - | - | + | - | + |
| miR-486  | miR-486-5p   | - | + | - | - | - | + | + | + |
| miR-497  | miR-497-5p   | - | + | - | - | - | + | + | + |
| miR-720  | miR-720      | - | + | - | - | - | + | - | - |
| miR-1843 | miR-1843-5p  | - | + | - | - | - | + | + | + |
| miR-3096 | miR-3096-5p  | - | + | - | - | - | + | - | + |
| miR-3107 | miR-3107-5p  | - | + | - | - | - | + | + | + |

**Total Whole Tissue**

370

**Total Epithelial Cells**

218

**Total**

393

195 miRNAs common to both whole tissue and epithelial cells

175 miRNAs unique to whole tissue

23 miRNAs unique to epithelial cells
