# Supplementary material for: Next Generation Sequencing Analysis Reveals Segmental Patterns of microRNA Expression in Mouse Epididymal Epithelial Cells
Source: PubMed Central journal article supplement (PMC4535982; doi:10.1371/journal.pone.0135605), 2015-08-13
Supplement: pone.0135605.s005.pdf [file pone.0135605.s005.pdf]

S2 Table. Relative expression levels of miRNAs identified by deep sequencing within mouse epididymal epithelial cells

| MicroRNA Family | GeneName      | Caput 1   | Caput 2   | Corpus 1 | Corpus 2  | Cauda 1   | Cauda 2   | False Discovery Rate (FDR) |                 |                |             |
|-----------------|---------------|-----------|-----------|----------|-----------|-----------|-----------|----------------------------|-----------------|----------------|-------------|
|                 |               |           |           |          |           |           |           | Caput to Corpus            | Corpus to Cauda | Caput to Cauda |             |
| let-7           | let-7a-1-3p   | 43.001    | 46.001    | 6.501    | 6.001     | 23.501    | 24.501    | 0.116844317                | 0.467224731     | 0.352272471    |             |
|                 | let-7a-5p     | 3240.501  | 3920.001  | 1010.501 | 1437.501  | 1804.001  | 2318.001  | 0.75434466                 | 0.291524728     | 0.076667217    |             |
|                 | let-7b-3p     | 43.001    | 31.001    | 2.001    | 5.001     | 12.001    | 20.001    | 0.031936796                | 0.328101241     | 0.133846455    |             |
|                 | let-7b-5p     | 1661.501  | 1887.501  | 372.501  | 403.501   | 466.501   | 655.501   | 0.067599277                | 0.200934175     | 0.000683351    |             |
|                 | let-7c-2-3p   | 43.001    | 46.001    | 6.501    | 6.001     | 23.501    | 24.501    | 0.116844317                | 0.467224731     | 0.352272471    |             |
|                 | let-7c-5p     | 13371.001 | 15785.501 | 2712.001 | 3744.001  | 3814.501  | 5136.501  | 0.014705736                | 0.044880172     | 3.16156E-05    |             |
|                 | let-7d-3p     | 135.001   | 166.001   | 30.001   | 45.001    | 119.001   | 111.001   | 0.329753301                | 0.482995553     | 0.875182121    |             |
|                 | let-7d-5p     | 372.001   | 411.001   | 169.001  | 251.001   | 311.001   | 352.001   | 0.217104047                | 0.349259749     | 0.858471933    |             |
|                 | let-7e-5p     | 514.001   | 588.001   | 123.001  | 168.001   | 150.001   | 234.001   | 0.223472254                | 0.102649063     | 0.001634182    |             |
|                 | let-7f-5p     | 9065.001  | 9612.001  | 3286.001 | 3944.001  | 5374.001  | 6899.001  | 0.814852018                | 0.291524728     | 0.285319522    |             |
|                 | let-7g-5p     | 2201.501  | 2618.001  | 920.001  | 1220.001  | 1567.501  | 1482.501  | 0.490338938                | 0.156711078     | 0.319853884    |             |
|                 | let-7i-5p     | 2243.501  | 2219.001  | 1082.001 | 1318.001  | 1572.501  | 2030.501  | 0.101167372                | 0.143211631     | 0.994653333    |             |
|                 | miR-9         | miR-9-3p  | 4.001     | 17.001   | 0.001     | 0.001     | 0.001     | 0.001                      | 0.043333249     | 0.534103566    | 0.004049515 |
|                 |               | miR-9-5p  | 124.001   | 192.001  | 1.001     | 4.001     | 3.001     | 7.001                      | 0.002741393     | 0.917314742    | 0.000437087 |
| miR-10          | miR-10a-3p    | 18.001    | 28.001    | 2.001    | 2.001     | 1.001     | 8.001     | 0.123216848                | 0.771785412     | 0.025663191    |             |
|                 | miR-10a-5p    | 20818.001 | 26151.001 | 5636.501 | 8369.001  | 11100.501 | 12992.501 | 0.217104047                | 0.237111924     | 0.005888885    |             |
| miR-15          | miR-10b-5p    | 23176.001 | 30357.001 | 6584.501 | 11109.001 | 11525.501 | 13759.501 | 0.508981727                | 0.03820591      | 0.001866808    |             |
|                 | miR-15a-5p    | 44.001    | 48.001    | 10.001   | 11.001    | 31.001    | 47.001    | 0.355129386                | 0.382174315     | 0.907023921    |             |
| miR-16          | miR-15b-5p    | 73.001    | 95.001    | 17.001   | 20.001    | 65.001    | 86.001    | 0.234115896                | 0.205394928     | 0.746116529    |             |
|                 | miR-16-5p     | 2106.001  | 2410.001  | 686.001  | 913.001   | 2749.001  | 2958.001  | 0.874801171                | 0.043897771     | 0.020831139    |             |
| miR-17          | miR-17-5p     | 89.001    | 105.001   | 38.001   | 42.001    | 87.001    | 81.001    | 0.749343992                | 0.880709989     | 0.831770684    |             |
| miR-19          | miR-19a-3p    | 22.001    | 38.501    | 8.001    | 6.001     | 31.001    | 17.001    | 0.580132729                | 0.696247668     | 0.907023921    |             |
|                 | miR-19b-3p    | 188.001   | 189.501   | 63.001   | 59.001    | 143.001   | 169.001   | 0.744087253                | 0.76034854      | 0.919532       |             |
| miR-20          | miR-20a-5p    | 123.001   | 127.001   | 52.001   | 66.001    | 170.001   | 165.001   | 0.489146405                | 0.543968619     | 0.08873631     |             |
| miR-21          | miR-21-3p     | 32.001    | 16.001    | 3.001    | 13.001    | 4.001     | 21.001    | 0.850570909                | 0.698757977     | 0.376800391    |             |
|                 | miR-21-5p     | 11513.001 | 12981.001 | 3046.001 | 3903.001  | 6178.001  | 7136.001  | 0.228338622                | 0.60368431      | 0.039557738    |             |
| miR-22          | miR-22-3p     | 25980.001 | 32993.001 | 4502.001 | 7240.001  | 13511.001 | 18425.001 | 0.268644472                | 0.009983922     | 0.009983922    |             |
|                 | miR-22-5p     | 23.001    | 27.001    | 2.001    | 3.001     | 10.001    | 14.001    | 0.064882036                | 0.387788766     | 0.279152478    |             |
| miR-23          | miR-23a-3p    | 382.501   | 387.001   | 91.001   | 106.001   | 309.001   | 523.001   | 0.207395911                | 0.039505793     | 0.230223282    |             |
|                 | miR-23b-3p    | 369.501   | 323.001   | 115.001  | 124.001   | 256.001   | 353.001   | 0.867689567                | 0.744648597     | 0.746116529    |             |
| miR-24          | miR-24-2-5p   | 58.001    | 58.001    | 15.001   | 29.001    | 54.001    | 83.001    | 0.960809654                | 0.467224731     | 0.280561835    |             |
|                 | miR-24-3p     | 127.001   | 133.001   | 36.001   | 46.001    | 66.001    | 103.001   | 0.740101737                | 0.868303619     | 0.473432392    |             |
| miR-25          | miR-25-3p     | 655.001   | 784.001   | 261.001  | 334.001   | 744.001   | 975.001   | 0.682545537                | 0.35414912      | 0.080192318    |             |
| miR-26          | miR-26a-5p    | 17006.001 | 20088.001 | 5622.001 | 9091.001  | 13815.001 | 19297.001 | 0.749420353                | 0.872504638     | 0.521928702    |             |
|                 | miR-26b-5p    | 431.001   | 417.001   | 228.001  | 224.001   | 530.001   | 654.001   | 0.233134598                | 0.677270278     | 0.049133431    |             |
| miR-27          | miR-27a-3p    | 373.501   | 373.001   | 95.501   | 99.001    | 303.501   | 672.501   | 0.284579822                | 0.031020189     | 0.098098663    |             |
|                 | miR-27b-3p    | 7990.501  | 8933.001  | 2069.501 | 2702.001  | 5876.501  | 10202.501 | 0.178098817                | 0.057493605     | 0.394304603    |             |
| miR-28          | miR-28-3p     | 38.001    | 51.001    | 16.001   | 20.001    | 28.001    | 43.001    | 0.793663415                | 0.849637459     | 0.967602756    |             |
|                 | miR-28-5p     | 38.001    | 23.001    | 14.001   | 13.001    | 26.001    | 27.001    | 0.648661003                | 0.855935899     | 0.807038844    |             |
| miR-29          | miR-29a-3p    | 1387.001  | 1806.001  | 417.001  | 516.001   | 793.001   | 1137.001  | 0.368266049                | 0.853412942     | 0.177720915    |             |
|                 | miR-29a-5p    | 9.001     | 15.001    | 5.001    | 6.001     | 19.001    | 43.001    | 0.718578284                | 0.287156641     | 0.039557738    |             |
|                 | miR-29b-3p    | 237.001   | 224.001   | 76.001   | 78.001    | 96.001    | 149.001   | 0.840166717                | 0.451837323     | 0.190248349    |             |
|                 | miR-29c-3p    | 204.001   | 248.001   | 41.001   | 59.001    | 87.001    | 110.001   | 0.148635876                | 0.849637459     | 0.039839009    |             |
| miR-30          | miR-30a-3p    | 312.001   | 334.001   | 120.001  | 136.001   | 293.001   | 577.001   | 0.793663415                | 0.236643438     | 0.055456689    |             |
|                 | miR-30a-5p    | 1948.001  | 1795.001  | 988.001  | 1034.001  | 1875.001  | 2821.001  | 0.079794323                | 0.876668333     | 0.032725731    |             |
|                 | miR-30b-5p    | 1603.001  | 1729.001  | 621.001  | 636.001   | 728.001   | 1269.001  | 0.89568274                 | 0.188188621     | 0.117853881    |             |
|                 | miR-30c-2-3p  | 35.001    | 38.001    | 8.001    | 8.001     | 18.001    | 22.001    | 0.297992636                | 0.872504638     | 0.317169798    |             |
|                 | miR-30c-5p    | 1079.001  | 1016.001  | 355.001  | 345.001   | 682.001   | 1349.001  | 0.757003491                | 0.45889658      | 0.530031392    |             |
|                 | miR-30d-3p    | 37.001    | 56.001    | 11.001   | 14.001    | 19.001    | 36.001    | 0.619438399                | 0.913982378     | 0.412092847    |             |
|                 | miR-30d-5p    | 751.001   | 755.001   | 290.001  | 466.001   | 794.001   | 801.001   | 0.233134598                | 0.913982378     | 0.207770947    |             |
| miR-31          | miR-30e-3p    | 204.001   | 223.001   | 58.001   | 71.001    | 112.001   | 237.001   | 0.624772727                | 0.76034854      | 0.905007683    |             |
|                 | miR-30e-5p    | 247.001   | 193.001   | 123.001  | 125.001   | 197.001   | 265.001   | 0.142334409                | 0.641649042     | 0.319853884    |             |
| miR-34          | miR-31-5p     | 78.001    | 80.001    | 5.001    | 5.001     | 18.001    | 12.001    | 0.017487684                | 0.853412942     | 0.006260884    |             |
|                 | miR-34a-5p    | 45.001    | 58.001    | 24.001   | 28.001    | 32.001    | 42.001    | 0.489146405                | 0.417908191     | 0.807038844    |             |
| miR-34b         | miR-34b-3p    | 15.001    | 25.001    | 8.001    | 10.001    | 79.001    | 31.001    | 0.764626318                | 0.296519788     | 0.063902055    |             |
|                 | miR-34b-5p    | 59.501    | 58.001    | 7.501    | 14.501    | 77.001    | 33.001    | 0.29355697                 | 0.349259749     | 0.936464789    |             |
|                 | miR-34c-5p    | 1077.501  | 1252.001  | 150.501  | 221.501   | 902.001   | 442.001   | 0.112286404                | 0.494027221     | 0.352272471    |             |
|                 | miR-92a-3p    | 122.001   | 163.001   | 102.001  | 219.001   | 212.001   | 244.001   | 0.003277264                | 0.291524728     | 0.02330421     |             |
| miR-92          | miR-92b-3p    | 42.001    | 45.001    | 5.001    | 7.001     | 13.001    | 42.001    | 0.282773913                | 0.596712943     | 0.563568512    |             |
|                 | miR-93-5p     | 235.001   | 267.001   | 80.001   | 106.001   | 241.001   | 231.001   | 0.960809654                | 0.750564645     | 0.558761313    |             |
| miR-96          | miR-96-5p     | 142.001   | 178.001   | 43.001   | 44.001    | 84.001    | 86.001    | 0.385199839                | 0.812232041     | 0.143176053    |             |
| miR-98          | miR-98-5p     | 284.001   | 305.001   | 92.001   | 144.001   | 106.001   | 138.001   | 0.831165866                | 0.044880172     | 0.026817099    |             |
| miR-99          | miR-99a-5p    | 379.001   | 410.001   | 232.001  | 234.001   | 440.001   | 717.001   | 0.080943661                | 0.805598074     | 0.018864892    |             |
|                 | miR-99b-3p    | 16.001    | 20.001    | 1.001    | 8.001     | 5.001     | 6.001     | 0.355129386                | 0.773059572     | 0.106418704    |             |
| miR-100         | miR-99b-5p    | 5963.001  | 6941.001  | 1551.001 | 2603.001  | 2332.001  | 3835.001  | 0.515942866                | 0.126967061     | 0.009611073    |             |
|                 | miR-100-5p    | 1511.001  | 1380.001  | 370.001  | 554.001   | 990.001   | 2000.001  | 0.699451604                | 0.349259749     | 0.447825343    |             |
| miR-101         | miR-101a-3p   | 351.001   | 351.001   | 183.001  | 235.001   | 343.001   | 430.001   | 0.171302727                | 0.708353875     | 0.319853884    |             |
|                 | miR-101b-3p   | 38.001    | 38.001    | 19.001   | 25.001    | 36.001    | 52.001    | 0.233134598                | 0.853412942     | 0.299698833    |             |
| miR-103         | miR-103-3p    | 898.001   | 1011.501  | 339.001  | 432.001   | 524.501   | 813.501   | 0.718578284                | 0.349259749     | 0.438398016    |             |
| miR-106         | miR-106b-5p   | 38.001    | 30.001    | 29.001   | 46.001    | 52.001    | 46.001    | 0.011420079                | 0.242723084     | 0.112671946    |             |
| miR-107         | miR-107-3p    | 48.001    | 49.501    | 8.001    | 10.001    | 14.501    | 22.501    | 0.154532828                | 0.868303619     | 0.04626529     |             |
| miR-125         | miR-125a-5p   | 491.001   | 735.001   | 90.001   | 172.001   | 326.001   | 380.001   | 0.068851655                | 0.518890568     | 0.210350374    |             |
|                 | miR-125b-1-3p | 19.001    | 14.001    | 3.001    | 10.001    | 4.001     | 7.001     | 0.960809654                | 0.279487659     | 0.131632143    |             |
|                 | miR-125b-2-3p | 18.001    | 25.001    | 5.001    | 12.001    | 11.001    | 11.001    | 0.915488987                | 0.488462109     | 0.389411401    |             |
|                 | miR-125b-5p   | 1827.001  | 2064.001  | 614.001  | 800.001   | 1269.001  | 2228.001  | 0.960809654                | 0.790625652     | 0.715605865    |             |
| miR-126         | miR-126-3p    | 718.001   | 1081.001  | 103.001  | 155.001   | 861.001   | 1088.001  | 0.006239608                | 0.001012289     | 0.204266224    |             |
|                 | miR-126-5p    | 7202.001  | 10409.001 | 1179.001 | 1610.001  | 8904.001  | 14131.001 | 0.001229604                | 1.53834E-05     | 0.010084777    |             |
| miR-127         | miR-127-3p    | 404.001   | 417.001   | 208.001  | 281.001   | 744.001   | 1532.001  | 0.082560614                | 0.021443417     | 5.73932E-05    |             |
| miR-128         | miR-128-3p    | 37.001    |           |          |           |           |           |                            |                 |                |             |

|         |               |           |           |          |          |          |          |              |              |               |
|---------|---------------|-----------|-----------|----------|----------|----------|----------|--------------|--------------|---------------|
|         | miR-148b-5p   | 11.001    | 16.001    | 2.001    | 2.001    | 9.001    | 10.001   | 0.29355697   | 0.467224731  | 0.832943518   |
| miR-149 | miR-149-5p    | 59.001    | 61.001    | 3.001    | 14.001   | 6.001    | 31.001   | 0.131578713  | 0.912754066  | 0.04626529    |
| miR-150 | miR-150-5p    | 38.001    | 69.001    | 7.001    | 17.001   | 86.001   | 149.001  | 0.29355697   | 0.00366284   | 0.004256332   |
| miR-151 | miR-151-3p    | 509.001   | 639.001   | 121.001  | 198.001  | 311.001  | 518.001  | 0.253481614  | 0.605557613  | 0.562967224   |
|         | miR-151-5p    | 544.001   | 772.001   | 134.001  | 285.001  | 399.001  | 471.001  | 0.558615943  | 0.992549801  | 0.428401486   |
| miR-152 | miR-152-3p    | 65.001    | 58.001    | 15.001   | 34.001   | 53.001   | 71.001   | 0.922547723  | 0.794952501  | 0.548944347   |
|         | miR-152-5p    | 27.001    | 23.001    | 7.001    | 7.001    | 15.001   | 23.001   | 0.756802832  | 0.856017331  | 0.907023921   |
| miR-153 | miR-153-3p    | 14.001    | 25.001    | 6.001    | 1.001    | 7.001    | 3.001    | 0.29355697   | 0.841437433  | 0.106203318   |
| miR-181 | miR-181a-1-3p | 12.001    | 28.001    | 6.001    | 8.001    | 15.001   | 29.001   | 0.916370198  | 0.716717296  | 0.431302402   |
|         | miR-181a-5p   | 3086.001  | 3968.001  | 875.001  | 1400.001 | 2384.001 | 4529.001 | 0.563622302  | 0.236471244  | 0.393360055   |
|         | miR-181b-5p   | 77.001    | 132.001   | 32.001   | 62.501   | 83.001   | 107.001  | 0.640586485  | 0.880709989  | 0.70566562    |
|         | miR-181c-3p   | 125.001   | 123.001   | 36.001   | 41.001   | 56.001   | 73.001   | 0.7049038    | 0.518890568  | 0.148227216   |
|         | miR-181c-5p   | 2361.001  | 3010.001  | 1108.001 | 1800.001 | 2480.001 | 2945.001 | 0.104979534  | 0.600239875  | 0.272083197   |
|         | miR-181d-5p   | 229.001   | 263.001   | 124.001  | 191.501  | 302.001  | 342.001  | 0.045758815  | 0.867705265  | 0.045562035   |
| miR-182 | miR-182-5p    | 2165.001  | 2716.001  | 348.001  | 534.001  | 610.001  | 629.001  | 0.011420079  | 0.173973906  | 0.870254E-05  |
| miR-183 | miR-183-5p    | 835.001   | 913.001   | 215.001  | 260.001  | 315.001  | 540.001  | 0.217104047  | 0.438703337  | 0.016438454   |
| miR-184 | miR-184-3p    | 5.001     | 4.001     | 17.001   | 34.001   | 27.001   | 6.001    | 0.003875638  | 0.0494697    | 0.148227216   |
| miR-186 | miR-186-5p    | 174.001   | 220.001   | 137.001  | 195.001  | 195.001  | 176.001  | 0.008357307  | 0.039505793  | 0.563568512   |
| miR-187 | miR-187-3p    | 39.001    | 50.001    | 9.001    | 16.001   | 12.001   | 22.001   | 0.619385307  | 0.380708399  | 0.061087467   |
| miR-190 | miR-190-5p    | 6.001     | 6.001     | 39.001   | 29.001   | 31.001   | 25.001   | 0.000362152  | 0.068922735  | 0.007055401   |
| miR-191 | miR-191-5p    | 18787.001 | 22938.001 | 2629.001 | 4725.001 | 5959.001 | 6004.001 | 0.001229604  | 0.291524728  | 0.15156E-05   |
| miR-192 | miR-192-5p    | 802.001   | 1131.001  | 153.001  | 231.001  | 454.001  | 713.001  | 0.178098817  | 0.549859442  | 0.420855708   |
| miR-193 | miR-193-3p    | 25.001    | 21.001    | 7.001    | 13.001   | 10.001   | 26.001   | 0.770558799  | 0.750564645  | 0.863717722   |
| miR-194 | miR-194-5p    | 37.001    | 51.001    | 9.001    | 8.001    | 20.001   | 32.001   | 0.382956561  | 0.784073127  | 0.563568512   |
| miR-195 | miR-195-5p    | 478.001   | 379.001   | 135.001  | 155.001  | 157.001  | 245.001  | 0.845082443  | 0.177086088  | 0.046346215   |
| miR-196 | miR-196a-5p   | 10.001    | 12.001    | 111.001  | 113.001  | 118.001  | 185.001  | 1.80198E-05  | 0.275097663  | 3.54062E-05   |
|         | miR-196b-5p   | 11.001    | 29.001    | 119.001  | 148.001  | 424.001  | 1072.001 | 4.93534E-05  | 0.044880172  | 1.02274E-06   |
| miR-199 | miR-199a-3p   | 400.501   | 380.501   | 188.001  | 212.501  | 444.501  | 852.501  | 0.249252552  | 0.296519788  | 0.009983922   |
|         | miR-199a-5p   | 149.001   | 138.501   | 40.001   | 63.001   | 62.001   | 116.001  | 0.947925666  | 0.543968619  | 0.354758396   |
|         | miR-199b-3p   | 400.501   | 380.501   | 188.001  | 212.501  | 444.501  | 852.501  | 0.249252552  | 0.296519788  | 0.009983922   |
|         | miR-199b-5p   | 21.001    | 17.501    | 4.001    | 5.001    | 16.001   | 45.001   | 0.619385307  | 0.171987866  | 0.190248349   |
| miR-200 | miR-200a-3p   | 1166.001  | 1318.501  | 467.501  | 615.501  | 1084.501 | 963.001  | 0.640586485  | 0.750564645  | 0.936464789   |
|         | miR-200a-5p   | 40.001    | 53.001    | 8.001    | 24.001   | 21.001   | 22.001   | 0.784301294  | 0.494027221  | 0.177720915   |
|         | miR-200b-3p   | 918.001   | 1120.001  | 405.001  | 473.001  | 1468.001 | 1358.001 | 0.648661003  | 0.296519788  | 0.057117227   |
|         | miR-200b-5p   | 26.001    | 20.001    | 7.001    | 4.001    | 13.001   | 15.001   | 0.60342456   | 0.870169895  | 0.649131957   |
|         | miR-200c-3p   | 1200.001  | 1416.001  | 455.001  | 579.001  | 590.001  | 498.001  | 0.795926833  | 0.022396009  | 0.010084777   |
| miR-203 | miR-203-3p    | 56.001    | 93.001    | 13.001   | 17.001   | 50.001   | 61.001   | 0.231816378  | 0.349259749  | 0.875182121   |
| miR-204 | miR-204-5p    | 7611.001  | 8467.501  | 533.001  | 878.001  | 163.001  | 169.001  | 1.39946E-05  | 1.14382E-06  | 1.26E-10      |
| miR-205 | miR-205-5p    | 3355.001  | 3594.001  | 2185.001 | 2568.001 | 4708.001 | 5434.001 | 0.031363446  | 0.907561538  | 0.018864892   |
| miR-210 | miR-210-3p    | 179.001   | 213.001   | 115.001  | 147.001  | 77.001   | 114.001  | 0.031936796  | 0.001012289  | 0.050786432   |
| miR-214 | miR-214-3p    | 40.001    | 40.001    | 13.001   | 10.001   | 10.001   | 20.001   | 0.740101737  | 0.490425066  | 0.150960999   |
| miR-218 | miR-218-5p    | 37.001    | 36.001    | 11.001   | 14.001   | 16.001   | 24.001   | 0.935389018  | 0.543968619  | 0.334164459   |
| miR-221 | miR-221-3p    | 341.001   | 366.001   | 131.001  | 146.001  | 306.001  | 407.001  | 0.814810132  | 0.677270278  | 0.351832624   |
|         | miR-221-5p    | 16.001    | 15.001    | 4.001    | 1.001    | 6.001    | 5.001    | 0.245986661  | 0.957134072  | 0.193119216   |
| miR-222 | miR-222-3p    | 33.001    | 33.001    | 71.001   | 68.001   | 183.001  | 150.001  | 0.00284278   | 0.868303619  | 0.317219E-05  |
| miR-300 | miR-300-3p    | 4.001     | 3.001     | 4.001    | 3.001    | 13.001   | 16.001   | 0.131578713  | 0.417908191  | 0.006800246   |
| miR-301 | miR-301a-3p   | 298.001   | 281.001   | 126.001  | 173.001  | 174.001  | 269.001  | 0.2323134598 | 0.234257603  | 0.026591674   |
| miR-320 | miR-320-3p    | 95.001    | 100.001   | 39.001   | 63.001   | 79.001   | 61.001   | 0.355129386  | 0.287156641  | 0.715605865   |
| miR-322 | miR-322-5p    | 134.001   | 214.001   | 25.001   | 49.001   | 159.001  | 206.001  | 0.116379637  | 0.034149076  | 0.307442061   |
| miR-324 | miR-324-5p    | 44.001    | 40.001    | 26.001   | 17.001   | 55.001   | 68.001   | 0.506059627  | 0.588389043  | 0.101152817   |
| miR-326 | miR-326-3p    | 19.001    | 11.001    | 6.001    | 3.001    | 10.001   | 14.001   | 0.852238981  | 0.856017331  | 0.934538054   |
| miR-328 | miR-328-3p    | 51.001    | 50.001    | 12.001   | 22.001   | 32.001   | 54.001   | 0.852238981  | 0.855935899  | 0.912053176   |
|         | miR-328-5p    | 13.001    | 22.001    | 4.001    | 1.001    | 17.001   | 24.001   | 0.217104047  | 0.107232451  | 0.432722937   |
| miR-339 | miR-339-5p    | 10.001    | 15.001    | 1.001    | 3.001    | 5.001    | 15.001   | 0.365431406  | 0.500446429  | 0.907023921   |
| miR-340 | miR-340-5p    | 865.001   | 918.001   | 147.001  | 185.001  | 252.001  | 354.001  | 0.023338489  | 0.593179643  | 0.001645886   |
| miR-342 | miR-342-3p    | 50.001    | 43.001    | 21.001   | 24.001   | 54.001   | 77.001   | 0.508981727  | 0.602516409  | 0.108312421   |
| miR-350 | miR-350-3p    | 11.001    | 12.001    | 2.001    | 2.001    | 5.001    | 4.001    | 0.379906351  | 0.880709989  | 0.229819321   |
| miR-351 | miR-351-5p    | 31.001    | 57.001    | 8.001    | 15.001   | 44.001   | 37.001   | 0.619438399  | 0.467224731  | 0.735923361   |
| miR-361 | miR-361-5p    | 53.001    | 68.001    | 15.001   | 16.001   | 20.001   | 65.001   | 0.508981727  | 0.880709989  | 0.501584088   |
| miR-362 | miR-362-3p    | 15.001    | 11.001    | 0.001    | 2.001    | 3.001    | 9.001    | 0.088110864  | 0.417908191  | 0.393360055   |
| miR-365 | miR-365-3p    | 9.001     | 9.001     | 1.001    | 0.001    | 6.001    | 22.001   | 0.103763137  | 0.039505793  | 0.402272257   |
| miR-374 | miR-374-5p    | 32.001    | 31.001    | 11.001   | 10.001   | 11.001   | 22.001   | 0.89568274   | 0.543968619  | 0.317169798   |
| miR-375 | miR-375-3p    | 1089.001  | 1356.001  | 160.001  | 253.001  | 112.001  | 31.001   | 0.101167372  | 0.002699887  | 3.16156E-05   |
| miR-378 | miR-378-3p    | 264.001   | 301.001   | 94.001   | 108.001  | 137.001  | 226.001  | 0.960481299  | 0.549859442  | 0.38085667    |
|         | miR-378-5p    | 16.001    | 14.001    | 2.001    | 2.001    | 7.001    | 8.001    | 0.217104047  | 0.694257026  | 0.393360055   |
| miR-379 | miR-379-5p    | 5.001     | 6.001     | 1.001    | 2.001    | 16.001   | 25.001   | 0.871395019  | 0.022396009  | 0.006380521   |
| miR-381 | miR-381-3p    | 7.001     | 8.001     | 2.001    | 5.001    | 17.001   | 33.001   | 0.722670773  | 0.083014493  | 0.007055401   |
| miR-409 | miR-409-5p    | 3.001     | 0.001     | 3.001    | 2.001    | 8.001    | 22.001   | 0.069713203  | 0.4148897013 | 0.003134955   |
| miR-410 | miR-410-3p    | 26.001    | 17.001    | 11.001   | 17.001   | 69.001   | 133.001  | 0.249252552  | 0.034149076  | 0.000276796   |
| miR-411 | miR-411-5p    | 77.001    | 63.001    | 20.001   | 41.001   | 130.001  | 321.001  | 0.756802832  | 0.01400386   | 0.000606487   |
| miR-421 | miR-421-3p    | 28.001    | 34.001    | 15.001   | 33.001   | 31.001   | 49.001   | 0.091782181  | 0.609075121  | 0.206096201   |
| miR-423 | miR-423-3p    | 76.001    | 93.001    | 14.001   | 31.001   | 69.001   | 72.001   | 0.370644098  | 0.406691103  | 0.907023921   |
|         | miR-423-5p    | 33.001    | 47.001    | 14.001   | 10.001   | 22.001   | 27.001   | 0.719638751  | 0.880709989  | 0.484248178   |
| miR-425 | miR-425-5p    | 68.001    | 88.001    | 10.001   | 29.001   | 47.001   | 39.001   | 0.29355697   | 0.880709989  | 0.285319522   |
| miR-429 | miR-429-3p    | 1181.001  | 1362.001  | 264.001  | 296.001  | 572.001  | 567.001  | 0.171302727  | 0.868303619  | 0.06612475    |
| miR-434 | miR-434-3p    | 32.001    | 49.001    | 23.001   | 57.001   | 131.001  | 250.001  | 0.043332249  | 0.069936363  | 0.00011696    |
| miR-449 | miR-449a-5p   | 8.001     | 20.001    | 1.001    | 3.001    | 18.001   | 8.001    | 0.312796486  | 0.319551049  | 0.849817974   |
| miR-450 | miR-450a-5p   | 12.001    | 32.001    | 5.001    | 7.001    | 25.001   | 44.001   | 0.817939789  | 0.172557131  | 0.094484217   |
| miR-451 | miR-451       | 35.001    | 45.001    | 5.001    | 8.001    | 49.001   | 95.001   | 0.226721841  | 0.025437926  | 0.062765488   |
| miR-455 | miR-455-5p    | 13.001    | 23.001    | 6.001    | 6.001    | 4.001    | 4.001    | 0.96616353   | 0.11445038   | 0.036741112   |
| miR-465 | miR-465a-5p   | 1.001     | 1.001     | 2.001    | 3.001    | 18.001   | 12.001   | 0.043332249  | 0.291524728  | 0.000838379   |
|         | miR-465c-5p   | 3.001     | 6.001     | 7.001    | 18.001   | 35.001   | 13.001   | 0.023338489  | 0.805598074  | 0.021226464   |
| miR-467 | miR-467a-5p   | 76.001    | 108.001   | 10.001   | 12.001   | 7.001    | 13.001   | 0.014841001  | 0.11154413   | 6.11264E-05   |
|         | miR-467d-5p   | 15.001    | 9.001     | 0.001    | 1.001    | 2.001    | 2.001    | 0.064624836  | 0.855935899  | 0.073314379   |
| miR-470 | miR-470-5p    | 13.001    | 31.001    | 25.001   | 64.001   | 95.001   | 54.001   | 0.006600332  | 0.694257026  | 0.007621196   |
| miR-484 | miR-484       | 26.001    | 32.001    | 8.001    | 16.001   | 27.001   | 17.001   | 0.845082443  | 0.776719402  | 0.825455892</ |

|                 |                     |         |         |        |        |         |         |             |             |             |
|-----------------|---------------------|---------|---------|--------|--------|---------|---------|-------------|-------------|-------------|
| <i>miR-743</i>  | <i>miR-743b-3p</i>  | 5.001   | 8.001   | 7.001  | 28.001 | 58.001  | 14.001  | 0.055719926 | 0.856017331 | 0.049133431 |
| <i>miR-744</i>  | <i>miR-744-5p</i>   | 136.001 | 156.001 | 20.001 | 46.001 | 42.001  | 30.001  | 0.207395911 | 0.200934175 | 0.003134955 |
| <i>miR-871</i>  | <i>miR-871-3p</i>   | 15.001  | 27.001  | 29.001 | 75.001 | 74.001  | 78.001  | 0.001229604 | 0.500446429 | 0.00224783  |
|                 | <i>miR-871-5p</i>   | 2.001   | 2.001   | 1.001  | 8.001  | 20.001  | 7.001   | 0.131578713 | 0.740603361 | 0.023050554 |
| <i>miR-872</i>  | <i>miR-872-3p</i>   | 54.001  | 66.001  | 11.001 | 12.001 | 18.001  | 28.001  | 0.198156321 | 0.856017331 | 0.061297746 |
| <i>miR-872</i>  | <i>miR-872-5p</i>   | 110.001 | 168.001 | 30.001 | 42.001 | 54.001  | 50.001  | 0.385199839 | 0.357772646 | 0.028129266 |
| <i>miR-881</i>  | <i>miR-881-3p</i>   | 10.001  | 9.001   | 20.001 | 56.001 | 95.001  | 53.001  | 0.004928654 | 0.876668333 | 0.002320534 |
| <i>miR-1198</i> | <i>miR-1198-5p</i>  | 20.001  | 28.001  | 4.001  | 11.001 | 7.001   | 19.001  | 0.793491612 | 0.778326759 | 0.393360055 |
| <i>miR-1249</i> | <i>miR-1249-3p</i>  | 14.001  | 14.001  | 2.001  | 5.001  | 5.001   | 8.001   | 0.619385307 | 0.853412942 | 0.317169798 |
| <i>miR-1251</i> | <i>miR-1251-5p</i>  | 16.001  | 18.001  | 5.001  | 8.001  | 2.001   | 4.001   | 0.89568274  | 0.044955727 | 0.01862306  |
| <i>miR-1839</i> | <i>miR-1839-5p</i>  | 93.001  | 93.001  | 22.001 | 64.001 | 46.001  | 58.001  | 0.756802832 | 0.294215526 | 0.315593316 |
| <i>miR-1843</i> | <i>miR-1843-5p</i>  | 34.001  | 43.001  | 10.001 | 22.001 | 10.001  | 19.001  | 0.845082443 | 0.11445038  | 0.06612475  |
|                 | <i>miR-1843b-5p</i> | 10.001  | 10.001  | 3.001  | 2.001  | 4.001   | 7.001   | 0.718578284 | 0.887720304 | 0.501584088 |
| <i>miR-3096</i> | <i>miR-3096-5p</i>  | 9.001   | 11.001  | 4.001  | 10.001 | 15.001  | 25.001  | 0.368266049 | 0.777668958 | 0.109199006 |
| <i>miR-3107</i> | <i>miR-3107-5p</i>  | 78.501  | 97.001  | 33.501 | 17.501 | 271.501 | 675.501 | 0.661487973 | 0.001012289 | 0.000198657 |

\* red shading indicates absence of miRNA from that sample (i.e. <10 average number of reads across both technical replicates)
