# Supplementary material for: Next Generation Sequencing Analysis Reveals Segmental Patterns of microRNA Expression in Mouse Epididymal Epithelial Cells
Source: PubMed Central journal article supplement (PMC4535982; doi:10.1371/journal.pone.0135605), 2015-08-13
Supplement: pone.0135605.s006.pdf [file pone.0135605.s006.pdf]

S3 Table: Comparison of miRNAs identified within mouse, human and rat epididymal tissue

| miRNA Family | miRNA*    | Mouse (mmu) | Human <sup>1</sup> (hsa) | Rat <sup>2</sup> (rno) |
|--------------|-----------|-------------|--------------------------|------------------------|
| let-7        | let-7a    | +           | +                        | +                      |
|              | let-7b    | +           | +                        | +                      |
|              | let-7c    | +           | +                        | +                      |
|              | let-7d    | +           | +                        | +                      |
|              | let-7e    | +           | +                        | +                      |
|              | let-7f    | +           | +                        | +                      |
|              | let-7i    | +           | +                        | +                      |
| miR-98       | miR-98    | +           | +                        | +                      |
|              | miR-10a   | +           | +                        | +                      |
|              | miR-10b   | +           | +                        | +                      |
| miR-15b      | miR-15b   | +           | +                        | +                      |
|              | miR-16    | +           | +                        | +                      |
|              | miR-17    | +           | +                        | +                      |
| miR-20       | miR-20a   | +           | +                        | +                      |
| miR-22       | miR-22    | +           | +                        | +                      |
| miR-23       | miR-23a   | +           | +                        | +                      |
|              | miR-23b   | +           | +                        | +                      |
| miR-24       | miR-24    | +           | +                        | +                      |
| miR-25       | miR-25    | +           | +                        | +                      |
| miR-26       | miR-26a   | +           | +                        | +                      |
| miR-27       | miR-27a   | +           | +                        | +                      |
| miR-29       | miR-27b   | +           | +                        | +                      |
|              | miR-29a   | +           | +                        | +                      |
|              | miR-29c   | +           | +                        | +                      |
| miR-30       | miR-30a   | +           | +                        | +                      |
|              | miR-30b   | +           | +                        | +                      |
|              | miR-30c   | +           | +                        | +                      |
|              | miR-30d   | +           | +                        | +                      |
|              | miR-30e   | +           | +                        | +                      |
| miR-31       | miR-31    | +           | +                        | +                      |
| miR-34       | miR-34a   | +           | +                        | +                      |
|              | miR-34b   | +           | +                        | +                      |
|              | miR-34c   | +           | +                        | +                      |
| miR-93       | miR-93    | +           | +                        | +                      |
| miR-99       | miR-99a   | +           | +                        | +                      |
|              | miR-99b   | +           | +                        | +                      |
| miR-100      | miR-100   | +           | +                        | +                      |
| miR-103      | miR-103   | +           | +                        | +                      |
| miR-106      | miR-106b  | +           | +                        | +                      |
| miR-107      | miR-107   | +           | +                        | +                      |
| miR-125      | miR-125a  | +           | +                        | +                      |
|              | miR-125b  | +           | +                        | +                      |
| miR-127      | miR-127   | +           | +                        | +                      |
| miR-130      | miR-130a  | +           | +                        | +                      |
|              | miR-130b  | +           | +                        | +                      |
| miR-132      | miR-132   | +           | +                        | +                      |
| miR-133      | miR-133a  | +           | +                        | +                      |
|              | miR-133b  | +           | +                        | +                      |
| miR-134      | miR-134   | +           | +                        | +                      |
| miR-135a     | miR-135a  | +           | +                        | +                      |
| miR-139      | miR-139   | +           | +                        | +                      |
| miR-140      | miR-140   | +           | +                        | +                      |
| miR-141      | miR-141   | +           | +                        | +                      |
| miR-143      | miR-143   | +           | +                        | +                      |
| miR-148      | miR-148b  | +           | +                        | +                      |
| miR-150      | miR-150   | +           | +                        | +                      |
| miR-151      | miR-151   | +           | +                        | +                      |
| miR-152      | miR-152   | +           | +                        | +                      |
| miR-181      | miR-181a  | +           | +                        | +                      |
|              | miR-181b  | +           | +                        | +                      |
|              | miR-181c  | +           | +                        | +                      |
| miR-183      | miR-183   | +           | +                        | +                      |
| miR-184      | miR-184   | +           | +                        | +                      |
| miR-185      | miR-185   | +           | +                        | +                      |
| miR-187      | miR-187   | +           | +                        | +                      |
| miR-191      | miR-191   | +           | +                        | +                      |
| miR-194      | miR-194   | +           | +                        | +                      |
| miR-196      | miR-196a  | +           | +                        | +                      |
| miR-199      | miR-199a  | +           | +                        | +                      |
| miR-200      | miR-200a  | +           | +                        | +                      |
|              | miR-200b  | +           | +                        | +                      |
|              | miR-200c  | +           | +                        | +                      |
| miR-204      | miR-204   | +           | +                        | +                      |
| miR-205      | miR-205   | +           | +                        | +                      |
| miR-210      | miR-210   | +           | +                        | +                      |
| miR-212      | miR-212   | +           | +                        | +                      |
| miR-214      | miR-214   | +           | +                        | +                      |
| miR-221      | miR-221   | +           | +                        | +                      |
| miR-222      | miR-222   | +           | +                        | +                      |
| miR-296      | miR-296   | +           | +                        | +                      |
| miR-298      | miR-298   | +           | +                        | +                      |
| miR-324      | miR-324   | +           | +                        | +                      |
| miR-328      | miR-328   | +           | +                        | +                      |
| miR-330      | miR-330   | +           | +                        | +                      |
| miR-331      | miR-331   | +           | +                        | +                      |
| miR-337      | miR-337   | +           | +                        | +                      |
| miR-338      | miR-338   | +           | +                        | +                      |
| miR-339      | miR-339   | +           | +                        | +                      |
| miR-342      | miR-342   | +           | +                        | +                      |
| miR-345      | miR-345   | +           | +                        | +                      |
| miR-361      | miR-361   | +           | +                        | +                      |
| miR-365      | miR-365   | +           | +                        | +                      |
| miR-382      | miR-382   | +           | +                        | +                      |
| miR-409      | miR-409   | +           | +                        | +                      |
| miR-485      | miR-485   | +           | +                        | +                      |
| miR-487      | miR-487b  | +           | +                        | +                      |
| miR-501      | miR-501   | +           | +                        | +                      |
| let-7        | let-7a-1  | +           | -                        | -                      |
|              | let-7c-1  | +           | -                        | -                      |
|              | let-7c-2  | +           | -                        | -                      |
|              | let-7f-1  | +           | -                        | -                      |
|              | let-7g    | +           | +                        | -                      |
|              | let-7j    | +           | -                        | -                      |
| miR-1        | miR-1     | -           | -                        | +                      |
|              | miR-1a    | -           | -                        | -                      |
| miR-7        | miR-7     | -           | -                        | +                      |
|              | miR-7a-1  | +           | -                        | -                      |
| miR-9        | miR-7b    | -           | -                        | +                      |
|              | miR-9     | +           | -                        | +                      |
| miR-15       | miR-15a   | +           | -                        | -                      |
| miR-16       | miR-16-2  | +           | -                        | -                      |
| miR-18       | miR-18    | -           | -                        | +                      |
|              | miR-18a   | +           | +                        | -                      |
| miR-19       | miR-19a   | +           | -                        | +                      |
|              | miR-19b   | +           | -                        | +                      |
|              | miR-19b-1 | -           | +                        | -                      |
| miR-20       | miR-20b   | -           | +                        | +                      |

| Comparison          |                 |           |
|---------------------|-----------------|-----------|
| Mouse + rat + human | Total Conserved | 97 / 463  |
|                     | Conserved (%)   | 21        |
| Mouse + Rat         | Total Conserved | 143 / 341 |
|                     | Conserved (%)   | 42        |
| Mouse + Human       | Total Conserved | 131 / 417 |
|                     | Conserved (%)   | 31        |

|         |            |   |   |   |
|---------|------------|---|---|---|
| miR-21  | miR-21     | - | + | + |
|         | miR-21a    | + | - | - |
| miR-24  | miR-24-2   | + | - | - |
| miR-26  | miR-26a-2  | + | - | - |
|         | miR-26b    | + | - | + |
| miR-28  | miR-28     | - | + | + |
|         | miR-28a    | + | - | - |
| miR-29  | miR-29b    | + | - | + |
|         | miR-29b-1  | - | + | - |
|         | miR-29b-2  | - | + | - |
| miR-30  | miR-30c-1  | + | - | - |
|         | miR-30c-2  | + | + | - |
| miR-32  | miR-32     | + | - | + |
| miR-33  | miR-33     | + | - | + |
| miR-92  | miR-92     | - | - | + |
|         | miR-92a    | + | + | - |
|         | miR-92a-1  | + | + | - |
|         | miR-92a-2  | + | + | - |
|         | miR-92b    | + | + | - |
| miR-96  | miR-96     | + | - | + |
| miR-101 | miR-101a   | + | - | + |
|         | miR-101b   | + | - | + |
| miR-106 | miR-106a   | - | + | - |
| miR-122 | miR-122a   | - | - | + |
| miR-124 | miR-124    | + | - | - |
|         | miR-124a   | - | - | + |
| miR-125 | miR-125b-1 | + | + | - |
|         | miR-125b-2 | + | + | - |
| miR-126 | miR-126    | - | + | + |
|         | miR-126a   | + | - | - |
| miR-128 | miR-128    | + | - | - |
|         | miR-128a   | - | - | + |
|         | miR-128b   | - | - | + |
| miR-129 | miR-129    | - | + | + |
| miR-135 | miR-135a-2 | + | - | - |
|         | miR-135b   | + | - | + |
| miR-136 | miR-136    | + | - | + |
| miR-137 | miR-137    | + | - | + |
| miR-138 | miR-138    | + | - | + |
|         | miR-138-1  | - | + | - |
| miR-142 | miR-142    | - | - | + |
|         | miR-142a   | + | - | - |
| miR-144 | miR-144    | + | - | + |
| miR-145 | miR-145    | - | + | + |
|         | miR-145a   | + | - | - |
| miR-146 | miR-146    | - | - | + |
|         | miR-146a   | + | + | - |
|         | miR-146b   | + | + | - |
| miR-148 | miR-148a   | + | - | - |
| miR-149 | miR-149    | + | + | - |
| miR-153 | miR-153    | + | - | + |
| miR-154 | miR-154    | + | - | + |
| miR-155 | miR-155    | + | + | - |
| miR-181 | miR-181a-1 | + | - | - |
|         | miR-181a-2 | - | + | - |
| miR-181 | miR-181d   | + | + | - |
| miR-182 | miR-182    | + | + | - |
| miR-186 | miR-186    | + | - | + |
| miR-188 | miR-188    | + | + | - |
| miR-189 | miR-189    | - | - | + |
| miR-190 | miR-190    | - | - | + |
|         | miR-190a   | + | - | - |
| miR-192 | miR-192    | + | - | + |
| miR-193 | miR-193    | - | - | + |
|         | miR-193a   | + | + | - |
|         | miR-193b   | + | + | - |
| miR-195 | miR-195    | - | + | + |
|         | miR-195a   | + | - | - |
| miR-196 | miR-196a-2 | + | - | - |
|         | miR-196b   | + | - | + |
| miR-197 | miR-197    | - | + | - |
| miR-199 | miR-199b   | + | + | - |
| miR-202 | miR-202    | - | + | - |
| miR-203 | miR-203    | + | - | + |
| miR-206 | miR-206    | + | - | + |
| miR-207 | miR-207    | - | - | + |
| miR-208 | miR-208    | - | + | + |
|         | miR-208b   | + | - | - |
| miR-211 | miR-211    | + | - | + |
| miR-215 | miR-215    | - | - | + |
| miR-216 | miR-216    | - | - | + |
| miR-217 | miR-217    | - | - | + |
| miR-218 | miR-218    | + | - | + |
|         | miR-218-2  | - | + | - |
| miR-219 | miR-219    | - | - | + |
| miR-223 | miR-223    | + | - | + |
| miR-224 | miR-224    | - | - | + |
| miR-290 | miR-290    | - | - | + |
| miR-291 | miR-291    | - | - | + |
| miR-292 | miR-292    | - | - | + |
| miR-297 | miR-297    | - | - | + |
| miR-299 | miR-299    | - | - | + |
|         | miR-299a   | + | - | - |
| miR-300 | miR-300    | + | - | + |
| miR-301 | miR-301    | - | - | + |
| miR-301 | miR-301a   | + | - | - |
|         | miR-301b   | + | - | - |
| miR-320 | miR-320    | + | - | + |
|         | miR-320a   | - | + | - |
|         | miR-320b   | - | + | - |
|         | miR-320c   | - | + | - |
|         | miR-320d   | - | + | - |
| miR-322 | miR-322    | + | - | + |
| miR-323 | miR-323    | - | - | + |
| miR-325 | miR-325    | - | - | + |
| miR-326 | miR-326    | + | - | + |
| miR-327 | miR-327    | - | - | + |
| miR-329 | miR-329    | + | - | + |
| miR-333 | miR-333    | - | - | + |
| miR-335 | miR-335    | + | - | + |
| miR-336 | miR-336    | - | - | + |
| miR-340 | miR-340    | + | - | + |
| miR-341 | miR-341    | + | - | + |
| miR-343 | miR-343    | - | - | + |
| miR-344 | miR-344    | - | - | + |
| miR-346 | miR-346    | - | + | + |
| miR-347 | miR-347    | - | - | + |
| miR-349 | miR-349    | - | - | + |
| miR-350 | miR-350    | + | - | + |

|         |           |   |   |   |
|---------|-----------|---|---|---|
| miR-351 | miR-351   | + | - | + |
| miR-352 | miR-352   | - | - | + |
| miR-362 | miR-362   | + | + | - |
| miR-363 | miR-363   | - | + | + |
| miR-369 | miR-369   | + | - | + |
| miR-370 | miR-370   | - | + | + |
| miR-371 | miR-371   | - | + | - |
| miR-374 | miR-374   | - | - | + |
|         | miR-374b  | + | - | - |
| miR-375 | miR-375   | + | + | - |
| miR-376 | miR-376a  | + | - | + |
|         | miR-376b  | + | - | + |
|         | miR-376c  | + | - | + |
| miR-377 | miR-377   | - | + | + |
| miR-378 | miR-378   | - | + | + |
|         | miR-378a  | + | - | - |
|         | miR-378b  | + | - | - |
|         | miR-378c  | + | - | - |
|         | miR-378d  | + | - | - |
| miR-379 | miR-379   | + | - | + |
| miR-381 | miR-381   | + | - | + |
| miR-383 | miR-383   | - | + | + |
| miR-410 | miR-410   | + | - | - |
| miR-411 | miR-411   | + | - | - |
| miR-412 | miR-412   | - | - | + |
| miR-421 | miR-421   | + | - | + |
| miR-422 | miR-422a  | - | + | - |
|         | miR-422b  | - | - | + |
| miR-423 | miR-423   | + | + | - |
| miR-424 | miR-424   | - | + | + |
| miR-425 | miR-425   | + | + | - |
| miR-429 | miR-429   | + | - | + |
| miR-431 | miR-431   | + | - | + |
| miR-432 | miR-432   | - | + | - |
| miR-433 | miR-433   | - | + | + |
| miR-434 | miR-434   | + | - | - |
| miR-448 | miR-448   | - | - | + |
| miR-449 | miR-449   | - | - | + |
|         | miR-449a  | + | - | - |
| miR-450 | miR-450   | - | - | + |
|         | miR-450a  | + | - | - |
|         | miR-450b  | + | - | - |
| miR-451 | miR-451   | - | - | + |
|         | miR-451a  | + | - | - |
| miR-455 | miR-455   | + | + | - |
| miR-463 | miR-463   | + | - | - |
| miR-465 | miR-465a  | + | - | - |
|         | miR-465b  | + | - | - |
|         | miR-465c  | + | - | - |
| miR-466 | miR-466b  | + | - | - |
|         | miR-466c  | + | - | - |
|         | miR-466g  | + | - | - |
|         | miR-466p  | + | - | - |
| miR-467 | miR-467a  | + | - | - |
|         | miR-467b  | + | - | - |
|         | miR-467c  | + | - | - |
|         | miR-467d  | + | - | - |
|         | miR-467e  | + | - | - |
| miR-470 | miR-470   | + | - | - |
| miR-471 | miR-471   | + | - | - |
| miR-483 | miR-483   | - | + | + |
| miR-484 | miR-484   | + | + | - |
| miR-486 | miR-486   | - | + | - |
|         | miR-486a  | + | - | - |
|         | miR-486b  | + | - | - |
| miR-489 | miR-489   | - | + | + |
| miR-491 | miR-491   | - | + | - |
| miR-492 | miR-492   | - | + | - |
| miR-493 | miR-493   | - | - | + |
| miR-494 | miR-494   | - | + | + |
| miR-495 | miR-495   | - | + | - |
| miR-497 | miR-497   | - | + | + |
|         | miR-497a  | + | - | - |
| miR-499 | miR-499   | + | - | + |
| miR-500 | miR-500   | + | + | - |
| miR-502 | miR-502   | - | + | - |
| miR-503 | miR-503   | - | + | + |
| miR-504 | miR-504   | - | + | - |
| miR-505 | miR-505   | - | + | + |
| miR-508 | miR-508   | - | + | - |
| miR-509 | miR-509   | - | + | - |
| miR-509 | miR-509-3 | - | + | - |
| miR-511 | miR-511   | + | - | - |
| miR-513 | miR-513a  | - | + | - |
| miR-517 | miR-517   | - | + | - |
| miR-519 | miR-519b  | - | + | - |
| miR-520 | miR-520b  | - | + | - |
| miR-532 | miR-532   | + | + | - |
| miR-539 | miR-539   | - | + | + |
| miR-540 | miR-540   | - | - | + |
| miR-541 | miR-541   | + | - | + |
| miR-542 | miR-542   | - | + | + |
| miR-543 | miR-543   | - | + | + |
| miR-548 | miR-548a  | - | + | - |
|         | miR-548c  | - | + | - |
| miR-550 | miR-550   | - | + | - |
| miR-551 | miR-551b  | - | + | - |
| miR-559 | miR-559   | - | + | - |
| miR-570 | miR-570   | - | + | - |
| miR-572 | miR-572   | - | + | - |
| miR-574 | miR-574   | + | + | - |
| miR-582 | miR-582   | + | - | - |
| miR-589 | miR-589   | - | + | - |
| miR-596 | miR-596   | - | + | - |
| miR-598 | miR-598   | + | - | - |
| miR-602 | miR-602   | - | + | - |
| miR-603 | miR-603   | - | + | - |
| miR-615 | miR-615   | + | + | - |
| miR-621 | miR-621   | - | + | - |
| miR-623 | miR-623   | - | + | - |
| miR-625 | miR-625   | - | + | - |
| miR-628 | miR-628   | - | + | - |
| miR-629 | miR-629   | - | + | - |
| miR-635 | miR-635   | - | + | - |
| miR-636 | miR-636   | - | + | - |
| miR-638 | miR-638   | - | + | - |
| miR-639 | miR-639   | - | + | - |
| miR-641 | miR-641   | - | + | - |
| miR-652 | miR-652   | + | + | - |

|          |           |   |   |   |
|----------|-----------|---|---|---|
| miR-654  | miR-654   | - | + | - |
| miR-659  | miR-659   | - | + | - |
| miR-663  | miR-663   | - | + | - |
|          | miR-663b  | - | + | - |
| miR-664  | miR-664   | - | + | + |
| miR-665  | miR-665   | - | + | - |
| miR-669  | miR-669a  | + | - | - |
|          | miR-669c  | + | - | - |
|          | miR-669f  | + | - | - |
|          | miR-669l  | + | - | - |
|          | miR-669o  | + | - | - |
|          | miR-669p  | + | - | - |
| miR-671  | miR-671   | + | + | - |
| miR-672  | miR-672   | + | - | - |
| miR-674  | miR-674   | + | - | - |
| miR-675  | miR-675   | - | + | - |
| miR-676  | miR-676   | + | - | - |
| miR-677  | miR-677   | + | - | - |
| miR-708  | miR-708   | + | - | - |
| miR-720  | miR-720   | - | + | - |
| miR-741  | miR-741   | + | - | - |
| miR-743  | miR-743a  | + | - | - |
|          | miR-743b  | + | - | - |
| miR-744  | miR-744   | + | + | - |
| miR-760  | miR-760   | - | + | - |
| miR-766  | miR-766   | - | + | - |
| miR-768  | miR-768   | - | + | - |
| miR-769  | miR-769   | - | + | - |
| miR-802  | miR-802   | - | + | - |
| miR-871  | miR-871   | + | - | - |
| miR-872  | miR-872   | + | - | - |
| miR-874  | miR-874   | + | + | - |
| miR-877  | miR-877   | - | + | - |
| miR-878  | miR-878   | + | - | - |
| miR-880  | miR-880   | + | - | - |
| miR-881  | miR-881   | + | - | - |
| miR-883  | miR-883a  | + | - | - |
| miR-885  | miR-885   | - | + | - |
| miR-886  | miR-886   | - | + | - |
| miR-887  | miR-887   | - | + | - |
| miR-890  | miR-890   | - | + | - |
| miR-891  | miR-891a  | - | + | - |
|          | miR-891b  | - | + | - |
|          | miR-892a  | - | + | - |
|          | miR-892b  | - | + | - |
| miR-921  | miR-921   | - | + | - |
| miR-923  | miR-923   | - | + | - |
| miR-933  | miR-933   | - | + | - |
| miR-935  | miR-935   | - | + | - |
| miR-938  | miR-938   | - | + | - |
| miR-939  | miR-939   | - | + | - |
| miR-940  | miR-940   | - | + | - |
| miR-941  | miR-941   | - | + | - |
| miR-943  | miR-943   | - | + | - |
| miR-1180 | miR-1180  | - | + | - |
| miR-1181 | miR-1181  | - | + | - |
| miR-1184 | miR-1184  | - | + | - |
| miR-1198 | miR-1198  | + | - | - |
| miR-1202 | miR-1202  | - | + | - |
| miR-1207 | miR-1207  | - | + | - |
| miR-1224 | miR-1224  | - | + | - |
| miR-1225 | miR-1225  | - | + | - |
| miR-1226 | miR-1226  | - | + | - |
| miR-1228 | miR-1228  | - | + | - |
| miR-1229 | miR-1229  | - | + | - |
| miR-1231 | miR-1231  | - | + | - |
| miR-1234 | miR-1234  | - | + | - |
| miR-1236 | miR-1236  | - | + | - |
| miR-1238 | miR-1238  | - | + | - |
| miR-1244 | miR-1244  | - | + | - |
| miR-1246 | miR-1246  | - | + | - |
| miR-1247 | miR-1247  | + | + | - |
| miR-1249 | miR-1249  | + | + | - |
| miR-1251 | miR-1251  | + | - | - |
| miR-1254 | miR-1254  | - | + | - |
| miR-1260 | miR-1260  | - | + | - |
| miR-1263 | miR-1263  | - | + | - |
| miR-1267 | miR-1267  | - | + | - |
| miR-1268 | miR-1268  | - | + | - |
| miR-1270 | miR-1270  | - | + | - |
| miR-1271 | miR-1271  | - | + | - |
| miR-1272 | miR-1272  | - | + | - |
| miR-1274 | miR-1274a | - | + | - |
|          | miR-1274b | - | + | - |
| miR-1275 | miR-1275  | - | + | - |
| miR-1280 | miR-1280  | - | + | - |
| miR-1281 | miR-1281  | - | + | - |
| miR-1287 | miR-1287  | - | + | - |
| miR-1291 | miR-1291  | - | + | - |
| miR-1292 | miR-1292  | - | + | - |
| miR-1296 | miR-1296  | - | + | - |
| miR-1299 | miR-1299  | - | + | - |
| miR-1300 | miR-1300  | - | + | - |
| miR-1301 | miR-1301  | - | + | - |
| miR-1307 | miR-1307  | - | + | - |
| miR-1308 | miR-1308  | - | + | - |
| miR-1323 | miR-1323  | - | + | - |
| miR-1825 | miR-1825  | - | + | - |
| miR-1826 | miR-1826  | - | + | - |
| miR-1839 | miR-1839  | + | - | - |
| miR-1843 | miR-1843a | + | - | - |
|          | miR-1843b | + | - | - |
| miR-1981 | miR-1981  | + | - | - |
| miR-3068 | miR-3068  | + | - | - |
| miR-3082 | miR-3082  | + | - | - |
| miR-3475 | miR-3475  | + | - | - |
| miR-3535 | miR-3535  | + | - | - |
| miR-8114 | miR-8114  | + | - | - |

\*All miRNAs appearing above row 100 represent those that have been identified as being conserved in the epididymis of the mouse, rat, and human. Those in rows 100-465 have been identified in either 1 or 2 of these species.

1. Belleanne, C., Calvo, E., Thimon, V., Cyr, D. G., Legare, C., Garneau, L. and Sullivan, R. (2012). Role of microRNAs in controlling gene expression in different segments of the human epididymis. *PLoS One* 7, e34996. □
2. Ma, W., Xie, S., Ni, M., Huang, X., Hu, S., Liu, Q., Liu, A., Zhang, J. and Zhang, Y. (2012). MicroRNA-29a inhibited epididymal epithelial cell proliferation by targeting nuclear autoantigenic sperm protein (NASP). *J Biol Chem* 287, 10189-99. □
